# Supplementary material for: A green light emissive LaSr 2 AlO 5 :Er 3+ nanocrystalline material for solid state lighting: crystal phase refinement and down-conversion photoluminescence with high thermal stability
Source: Royal Society of Chemistry journal article supplement (doi:10.1039/d3ra07175h), 2024-01-01
Supplement: d3ra07175h1.pdf [file d3ra07175h1.pdf]

## Green light emissive LaSr<sub>2</sub>AlO<sub>5</sub>:Er<sup>3+</sup> nanocrystalline material for solid state lighting: Crystal phase refinement, down-conversion photoluminescence with high thermal stability

Pawan Kumar<sup>a</sup>, Devender Singh<sup>a\*</sup> and Harish Kumar<sup>b</sup>

<sup>a</sup>Department of Chemistry, Maharshi Dayanand University, Rohtak-124001, India.

<sup>b</sup>Department of Chemistry, School of Chemical Sciences, Central University of Haryana, Mahendergarh-123031, India.

### Electronic Supporting Information

$$R_p = \frac{\sum |I_0 - I_c|}{\sum I_c} \quad \text{S1}$$

$$R_{WP} = \left( \frac{M}{\sum w I_0^2} \right)^{1/2} \quad \text{S2}$$

$$M = \sum w (I_0 - I_c)^2 \quad \text{S3}$$

$$\chi^2 = \frac{M}{N_{obs} - N_{var}} \quad \text{S4}$$

$$x = \frac{X}{X + Y + Z} \quad y = \frac{Y}{X + Y + Z}$$

S5

$$u' = \frac{4x}{-2x + 12y + 3} \quad v' = \frac{9y}{-2x + 12y + 3}$$

S6

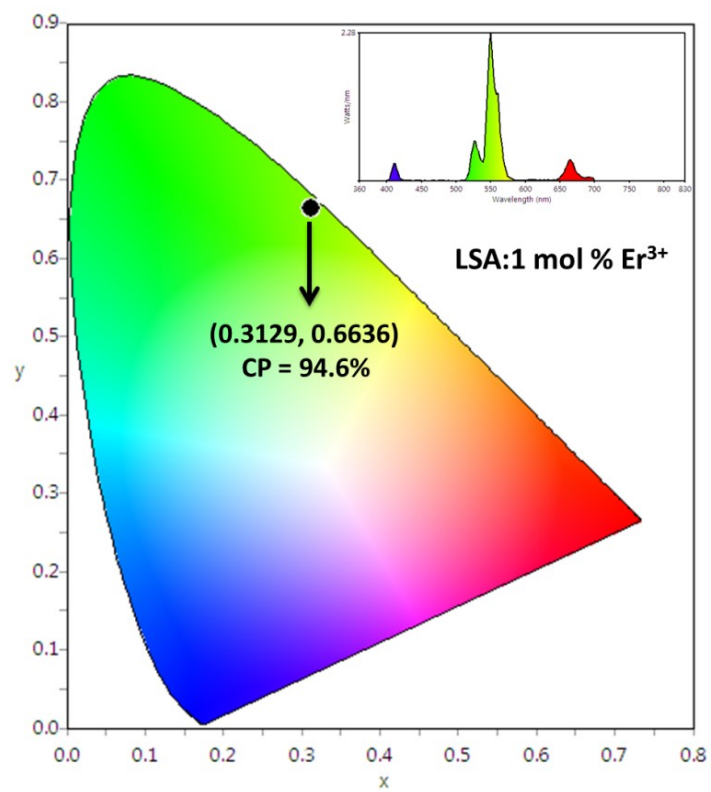

**Fig. S1** CIE 1931 profile of  $\text{La}_{0.99}\text{Sr}_2\text{AlO}_5:1 \text{ mol \% Er}^{3+}$  nanophosphor.

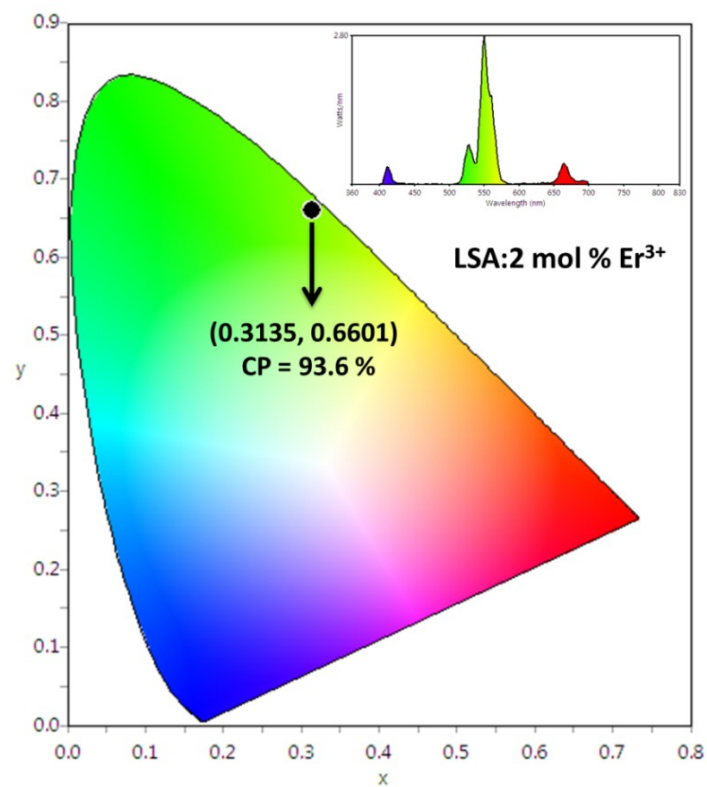

**Fig. S2** CIE 1931 profile of La<sub>0.98</sub>Sr<sub>2</sub>AlO<sub>5</sub>:2 mol % Er<sup>3+</sup> nanophosphor.

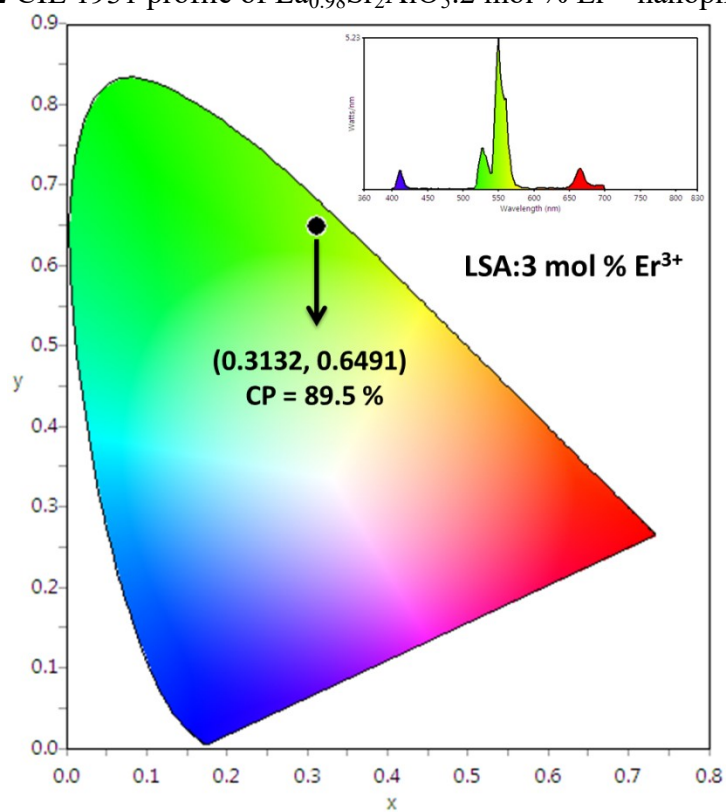

**Fig. S3** CIE 1931 profile of La<sub>0.97</sub>Sr<sub>2</sub>AlO<sub>5</sub>:3 mol % Er<sup>3+</sup> nanophosphor.

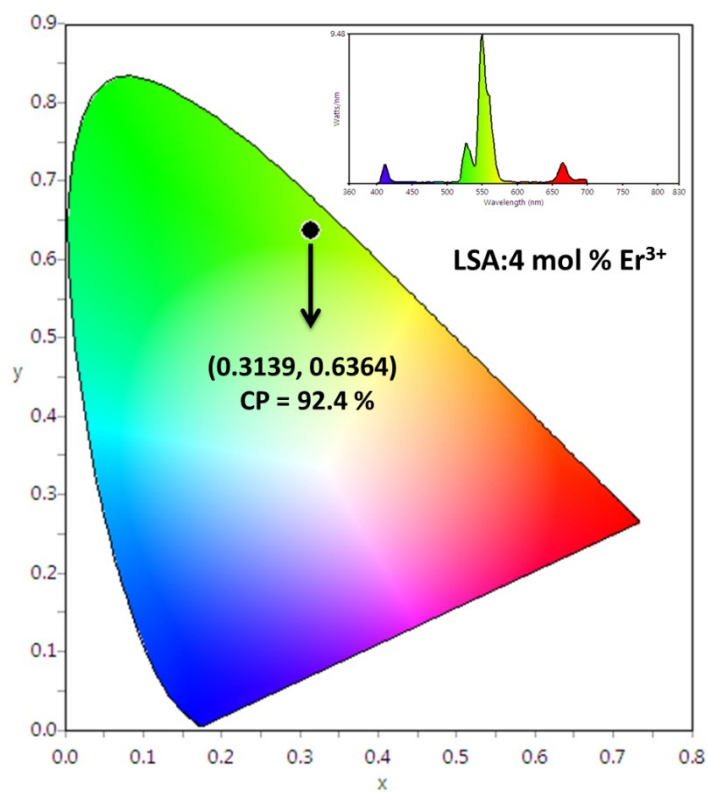

**Fig. S4** CIE 1931 profile of La<sub>0.96</sub>Sr<sub>2</sub>AlO<sub>5</sub>:4 mol % Er<sup>3+</sup> nanophosphor.

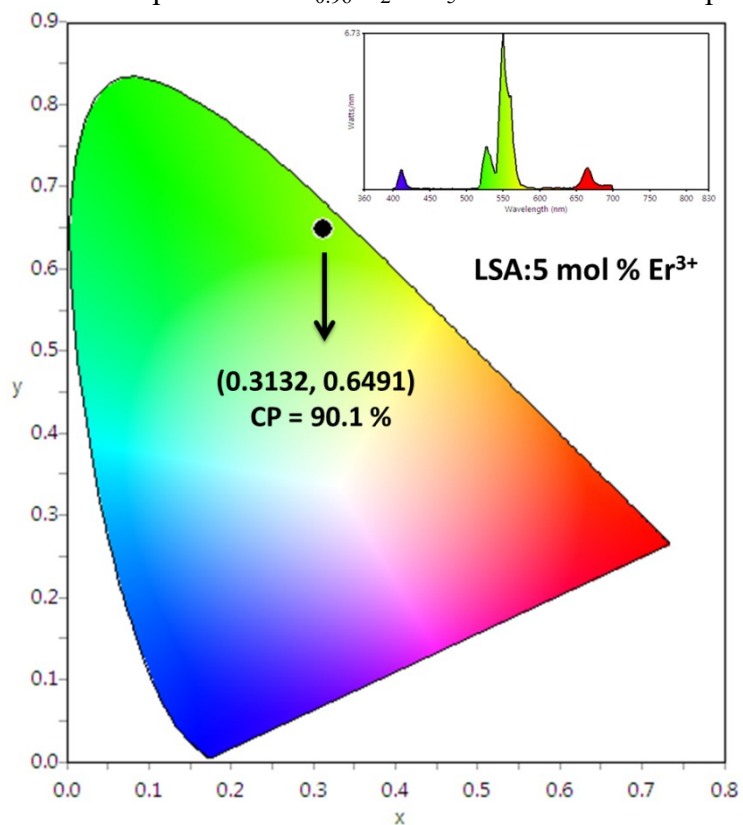

**Fig. S5** CIE 1931 profile of La<sub>0.95</sub>Sr<sub>2</sub>AlO<sub>5</sub>:5 mol % Er<sup>3+</sup> nanophosphor.

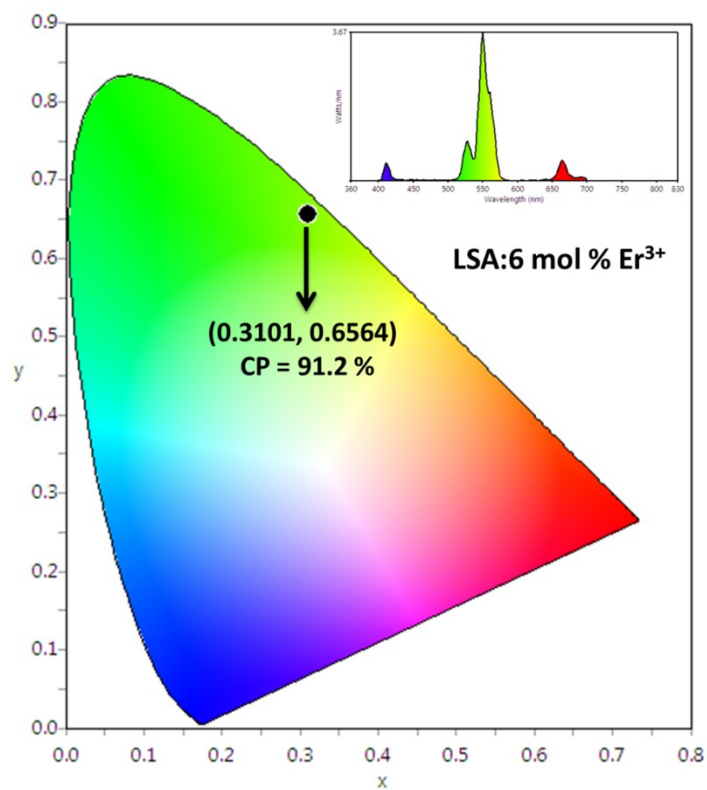

**Fig. S6** CIE 1931 profile of La<sub>0.94</sub>Sr<sub>2</sub>AlO<sub>5</sub>:6 mol % Er<sup>3+</sup> nanophosphor.

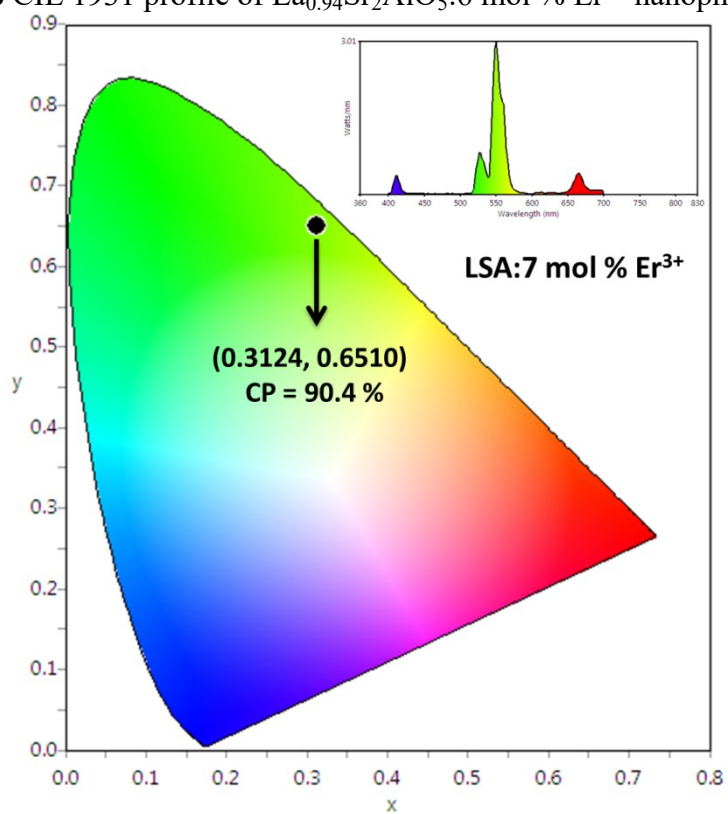

**Fig. S7** CIE 1931 profile of La<sub>0.93</sub>Sr<sub>2</sub>AlO<sub>5</sub>:7 mol % Er<sup>3+</sup> nanophosphor.

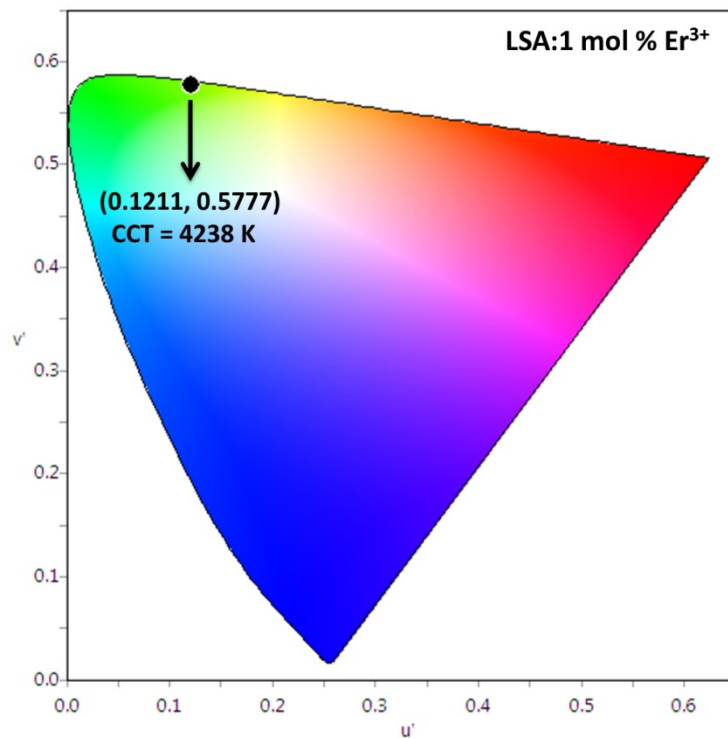

**Fig. S8** CIE 1976 profile of La<sub>0.99</sub>Sr<sub>2</sub>AlO<sub>5</sub>:1 mol % Er<sup>3+</sup> nanophosphor.

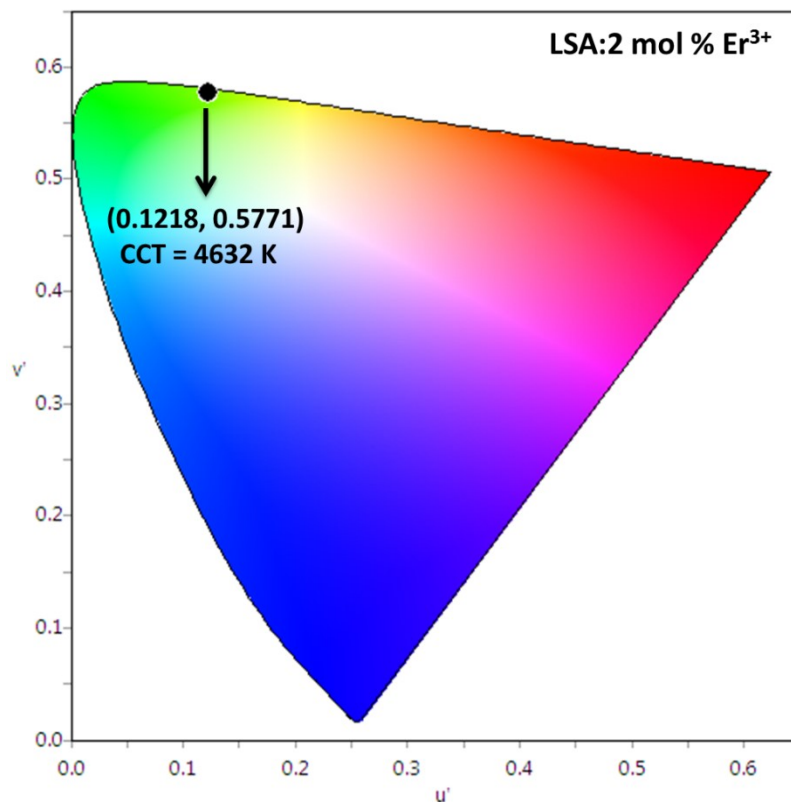

**Fig. S9** CIE 1976 profile of La<sub>0.98</sub>Sr<sub>2</sub>AlO<sub>5</sub>:2 mol % Er<sup>3+</sup> nanophosphor.

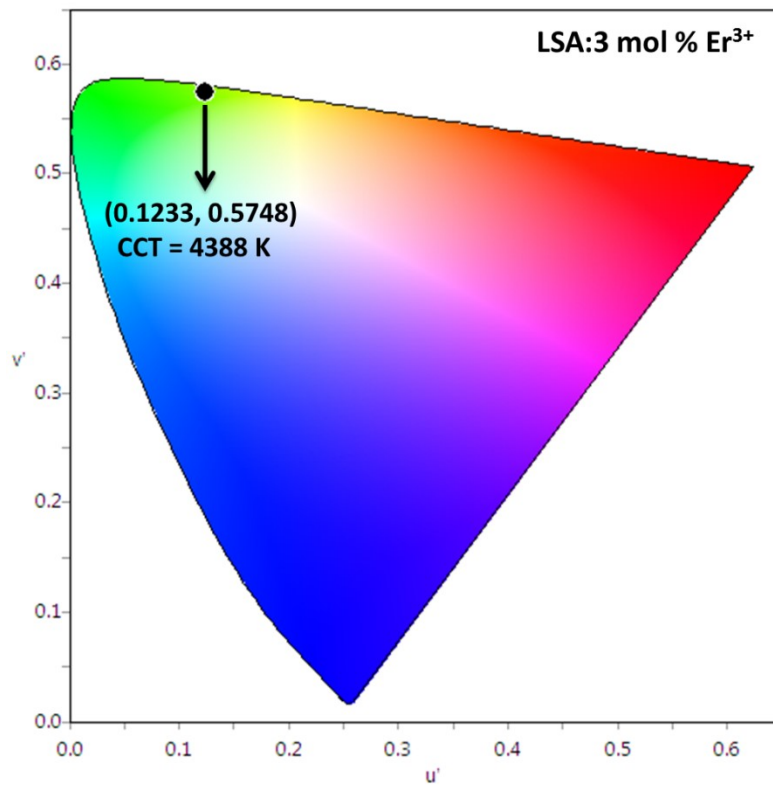

**Fig. S10** CIE 1976 profile of  $\text{La}_{0.97}\text{Sr}_2\text{AlO}_5:3 \text{ mol \% Er}^{3+}$  nanophosphor.

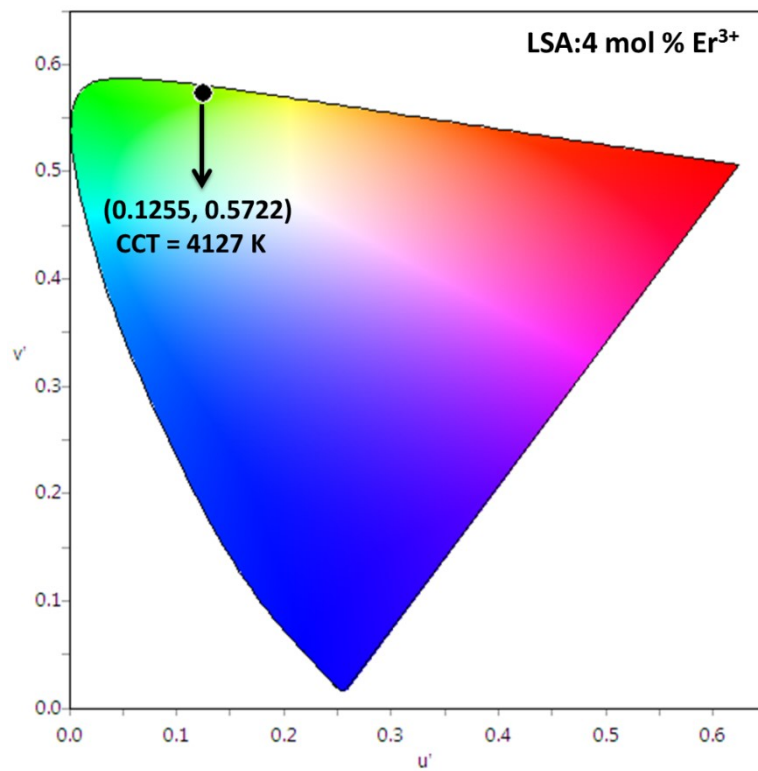

**Fig. S11** CIE 1976 profile of  $\text{La}_{0.96}\text{Sr}_2\text{AlO}_5:4 \text{ mol \% Er}^{3+}$  nanophosphor.

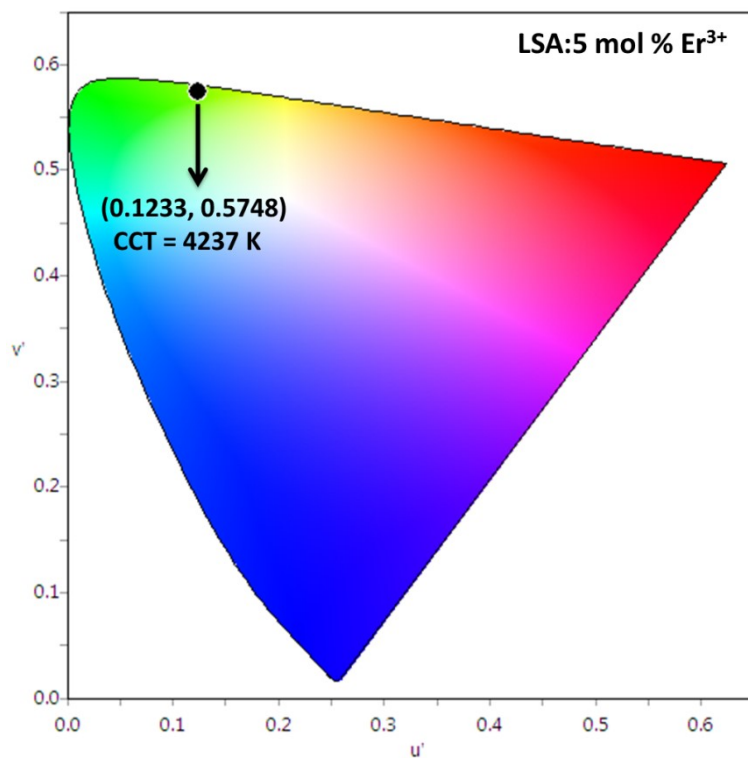

**Fig. S12** CIE 1976 profile of La<sub>0.95</sub>Sr<sub>2</sub>AlO<sub>5</sub>:5 mol % Er<sup>3+</sup> nanophosphor.

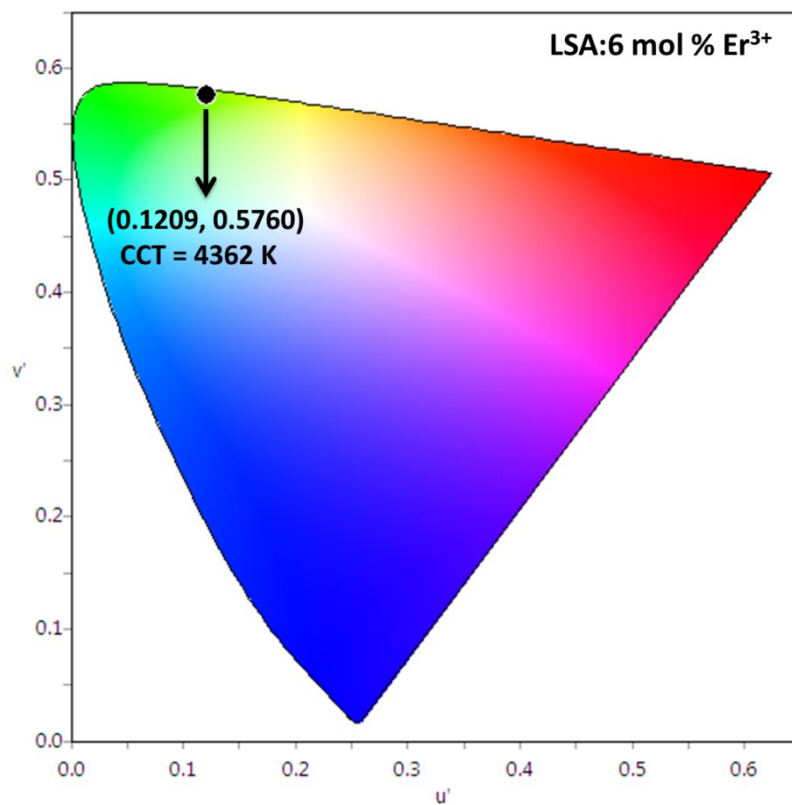

**Fig. S13** CIE 1976 profile of La<sub>0.94</sub>Sr<sub>2</sub>AlO<sub>5</sub>:6 mol % Er<sup>3+</sup> nanophosphor.



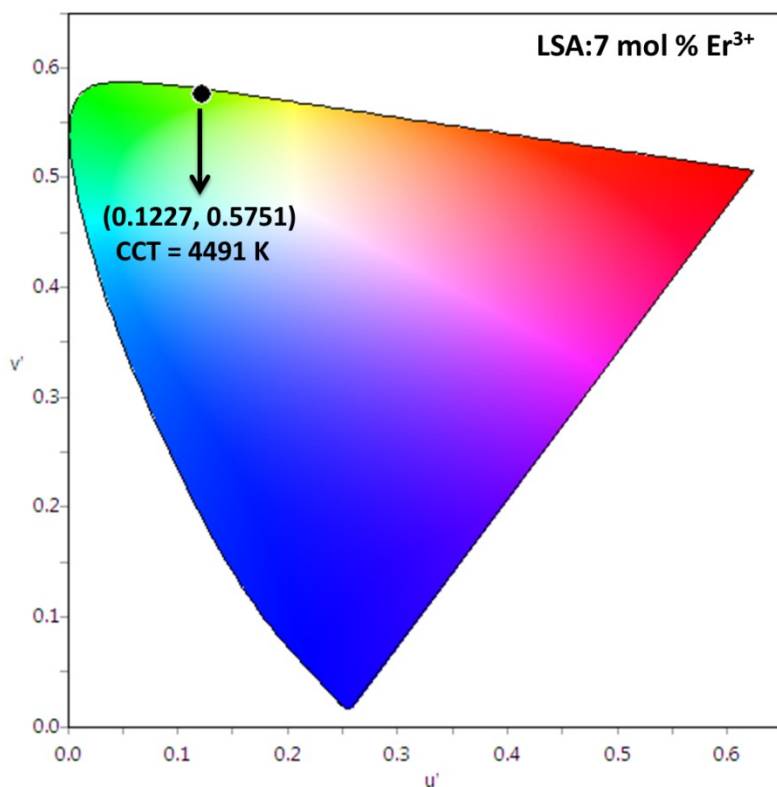

**Fig. S14** CIE 1976 profile of  $\text{La}_{0.93}\text{Sr}_2\text{AlO}_5:7 \text{ mol \% Er}^{3+}$  nanophosphor.

**Table S1** The atomistic and corresponding isotropic dislocation factors of  $\text{LaSr}_2\text{AlO}_5$  host.

| Atom  | x       | y       | z       | $W_{\text{yck}}$ | U     | Occ.  | Sym.  |
|-------|---------|---------|---------|------------------|-------|-------|-------|
| La(1) | 0.18215 | 0.66971 | 0.00000 | 8h               | 0.006 | 0.500 | m.2 m |
| Sr(2) | 0.18215 | 0.66971 | 0.00000 | 8h               | 0.006 | 0.500 | m.2 m |
| Sr(3) | 0.00000 | 0.00000 | 0.25000 | 4a               | 0.006 | 1.000 | 422   |
| Al(4) | 0.00000 | 0.50000 | 0.25000 | 4b               | 0.009 | 1.000 | -42m  |
| O(5)  | 0.00000 | 0.00000 | 0.00000 | 4c               | 0.012 | 1.000 | 4/m.. |
| O(6)  | 0.14343 | 0.64343 | 0.64207 | 16l              | 0.012 | 1.000 | ..m   |
